# Supplementary material
Source: PubMed Central journal article supplement (PMC5483326)
Supplement: NIHMS803915-supplement-supp.pdf [file NIHMS803915-supplement-supp.pdf]

E-Table 1: Studies Identified for Review and Their Clinical Contexts

| Study              | Patient Description     | Exercise Test   | Clinical Context        |
|--------------------|-------------------------|-----------------|-------------------------|
| Marjanski et al.   | 253 surgical candidates | 6MWT            | Preoperative evaluation |
| Saad et al.        | 36 surgical candidates  | 6MWT            | Preoperative evaluation |
| Nakagawa et al.    | 51 surgical candidates  | 6MWT, CPET      | Preoperative evaluation |
| Holden et al.      | 16 surgical candidates  | 6MWT, SCT, CPET | Preoperative evaluation |
| Umezu et al.       | 45 surgical candidates  | CPET, 6MWT      | Preoperative evaluation |
| Loewen et al.      | 364 surgical candidates | CPET            | Preoperative evaluation |
| Mao et al.         | 198 surgical candidates | CPET            | Preoperative evaluation |
| Novoa et al.       | 38 surgical candidates  | CPET            | Preoperative evaluation |
| Kasikcioglu et al. | 49 surgical candidates  | CPET            | Preoperative evaluation |
| Bobbio et al.      | 64 surgical candidates  | CPET            | Preoperative evaluation |
| Win et al.         | 101 surgical candidates | CPET            | Preoperative evaluation |
| Villani et al.     | 150 surgical candidates | CPET            | Preoperative evaluation |
| Nagamatsu et al.   | 211 surgical candidates | CPET            | Preoperative evaluation |
| Villani et al.     | 150 surgical candidates | CPET            | Preoperative evaluation |
| Wang et al.        | 40 surgical candidates  | CPET            | Preoperative evaluation |
| Walsh et al.       | 66 surgical candidates  | CPET            | Preoperative evaluation |
| Bolliger et al.    | 5 surgical candidates   | CPET            | Preoperative evaluation |
| Morice et al.      | 37 surgical candidates  | CPET            | Preoperative evaluation |
| Olsen et al.       | 52 surgical candidates  | CPET            | Preoperative evaluation |
| Miyoshi et al.     | 33 surgical candidates  | CPET            | Preoperative evaluation |

|                   |                         |                        |                         |
|-------------------|-------------------------|------------------------|-------------------------|
| Corris et al.     | 14 surgical candidates  | CPET                   | Preoperative evaluation |
| Epstein et al.    | 42 surgical candidates  | CPET                   | Preoperative evaluation |
| Campione et al.   | 99 surgical candidates  | CPET                   | Preoperative evaluation |
| Dales et al.      | 117 surgical candidates | CPET                   | Preoperative evaluation |
| Stanzani et al.   | 239 surgical candidates | CPET                   | Preoperative evaluation |
| Licker et al.     | 210 surgical candidates | CPET                   | Preoperative evaluation |
| Nagamatsu et al.  | 64 surgical candidates  | CPET                   | Preoperative evaluation |
| Fang et al.       | 107 surgical candidates | CPET                   | Preoperative evaluation |
| Brunelli et al.   | 160 surgical candidates | SCT, CPET              | Preoperative evaluation |
| Pate et al.       | 12 surgical candidates  | SCT, CPET, 12MWT       | Preoperative evaluation |
| Nikolic et al.    | 101 surgical candidates | SCT                    | Preoperative evaluation |
| Toker et al.      | 150 surgical candidates | SCT                    | Preoperative evaluation |
| Brunelli et al.   | 640 surgical candidates | SCT                    | Preoperative evaluation |
| Brunelli et al.   | 227 surgical candidates | SCT                    | Preoperative evaluation |
| Erdogan et al.    | 24 surgical candidates  | ISWT, ESWT, CPET       | Preoperative evaluation |
| Win et al.        | 125 surgical candidates | ISWT, CPET             | Preoperative evaluation |
| Win et al.        | 139 surgical candidates | ISWT                   | Preoperative evaluation |
| Bernasconi et al. | 56 surgical candidates  | SWT, CPET              | Preoperative evaluation |
| Granger et al.    | 20 surgical candidates  | 6MWT, ISWT, ESWT, CPET | Preoperative evaluation |
| Baser et al.      | 206 surgical candidates | CPET                   | Preoperative evaluation |

|                     |                           |            |                                                  |
|---------------------|---------------------------|------------|--------------------------------------------------|
| Nomori et al.       | 83 surgical candidates    | 6MWT       | Post-surgical follow up, preoperative evaluation |
| Nomori et al.       | 28 surgical candidates    | 6MWT       | Post-surgical follow up, preoperative evaluation |
| Maruyama et al.     | 50 surgical candidates    | 6MWT       | Post-surgical follow up, preoperative evaluation |
| Wang et al.         | 28 surgical candidates    | CPET       | Post-surgical follow up, preoperative evaluation |
| Nugen et al.        | 106 surgical candidates   | CPET       | Post-surgical follow up, preoperative evaluation |
| Bobbio et al.       | 11 surgical candidates    | CPET       | Post-surgical follow up, preoperative evaluation |
| Nezu et al.         | 82 surgical candidates    | CPET       | Post-surgical follow up, preoperative evaluation |
| Beccaria et al.     | 62 surgical candidates    | CPET       | Post-surgical follow up, preoperative evaluation |
| Brunelli et al.     | 115 surgical candidates   | SCT        | Post-surgical follow up, preoperative evaluation |
| Brunelli et al.     | 200 surgical candidates   | SCT        | Post-surgical follow up, preoperative evaluation |
| Nagamatsu et al.    | 164 surgical candidates   | CPET       | Post-surgical follow up, preoperative evaluation |
| Kushibe et al.      | 106 surgical candidates   | CPET       | Post-surgical follow up, preoperative evaluation |
| Kushibe et al.      | 100 surgical candidates   | CPET       | Post-surgical follow up, preoperative evaluation |
| Deslauriers et al.  | 100 lung cancer survivors | 6MWT       | Post-surgical follow up                          |
| Vainshelboim et al. | 17 lung cancer survivors  | 6MWT, CPET | Post-surgical follow up                          |

|                    |                                      |            |                                              |
|--------------------|--------------------------------------|------------|----------------------------------------------|
| Brunelli et al.    | 204 surgical candidates              | CPET       | Prognosis, preoperative evaluation           |
| Ritcher et al.     | 97 surgical candidates               | CPET       | Prognosis, preoperative evaluation           |
| Bolliger et al.    | 25 surgical candidates               | CPET       | Prognosis, preoperative evaluation           |
| Jones et al.       | 118 advanced lung cancer             | 6MWT       | Prognosis                                    |
| Kasymjanova et al. | 64 advanced lung cancer              | 6MWT       | Prognosis                                    |
| Roman et al.       | 392 all stages of lung cancer        | CPET       | Prognosis                                    |
| Jones et al.       | 398 all stages of lung cancer        | CPET       | Prognosis                                    |
| Torchio et al.     | 145 surgical candidates              | CPET       | Prognosis                                    |
| Brunelli et al.    | 296 stage I lung cancer              | SCT        | Prognosis                                    |
| Brunelli et al.    | 45 surgical candidates               | SCT        | Prognosis                                    |
| Epstein et al.     | 74 surgical candidates               | CPET       | Prognosis                                    |
| Quist et al.       | 71 advanced lung cancer              | CPET, 6MWT | Prognosis, efficacy of exercise intervention |
| Quist et al.       | 25 advanced lung cancer              | CPET, 6MWT | Prognosis, efficacy of exercise intervention |
| Morano et al.      | 24 surgical candidates               | 6MWT       | Efficacy of exercise intervention            |
| Coats et al.       | 16 surgical candidates               | 6MWT       | Efficacy of exercise intervention            |
| Sterzi et al.      | 110 lung cancer survivors            | 6MWT       | Efficacy of exercise intervention            |
| Oviat et al.       | 37 metastatic lung and other cancers | 6MWT       | Efficacy of exercise intervention            |
| Jones et al.       | 12 surgical candidates               | CPET       | Efficacy of exercise                         |

|                   |                          |            |                                                            |
|-------------------|--------------------------|------------|------------------------------------------------------------|
|                   |                          |            | intervention                                               |
| Stefanelli et al. | 40 surgical candidates   | CPET       | Efficacy of exercise intervention                          |
| Peddle et al.     | 9 surgical candidates    | CPET       | Efficacy of exercise intervention                          |
| Jones et al.      | 16 lung cancer survivors | CPET       | Efficacy of exercise intervention                          |
| Edvardsen et al.  | 61 lung cancer survivors | CPET       | Efficacy of exercise intervention                          |
| Gao et al.        | 342 surgical candidates  | CPET       | Efficacy of exercise intervention                          |
| Jones et al.      | 25 surgical candidates   | CPET, 6MWT | Efficacy of exercise intervention                          |
| Bruera et al.     | 31 advanced lung cancer  | 6MWT       | Efficacy of exercise intervention                          |
| England et al.    | 41 advanced lung cancer  | ISWT, CPET | Pretreatment evaluation                                    |
| Hwang et al.      | 24 advanced lung cancer  | CPET       | Pretreatment evaluation, efficacy of exercise intervention |
| Jones et al.      | 85 advanced lung cancer  | CPET       | Pretreatment evaluation                                    |
| Pless et al.      | 13 advanced lung cancer  | CPET       | Pretreatment evaluation                                    |

6MWT = six-minute walk test; 12MWT = twelve-minute walk test; CPET = cardiopulmonary exercise testing; ESWT = endurance shuttle walk test; ISWT = incremental shuttle walk test; SCT = stair-climbing test; SWT = shuttle walk test
